# Supplementary material
Source: Springer Nature journal article supplement (https://www.springerprofessional.de/resource/supplementary/40095_2012_54_MOESM7_ESM.pdf/11899712)

# Normal Drag Coefficient ( $C_n$ )

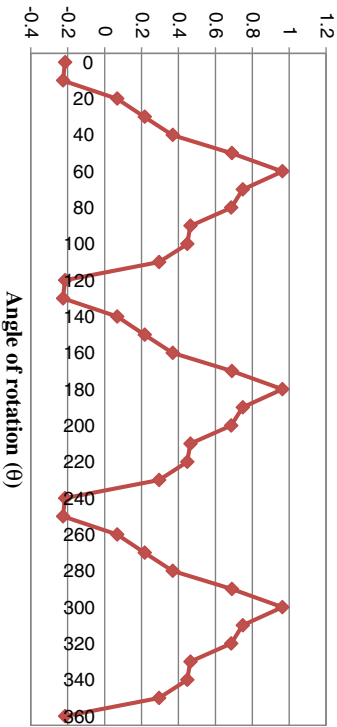

Supplement: MOESM7 [file 11899712]
